# Supplementary material for: Accumulating bright excitons on the hybridized local and charge transfer excited state for organic semiconductor lasers
Source: Royal Society of Chemistry journal article supplement (doi:10.1039/d2tc01301k), 2022-01-01
Supplement: d2tc01301k1.pdf [file d2tc01301k1.pdf]

## Electronic Supplementary Information

### **Accumulating Bright Excitons on Hybridized Local and Charge Transfer Excited State for Organic Semiconductor Lasers**

Rui Chen,<sup>ab</sup> Wu Zhou,<sup>ab</sup> Yanjun Gong,<sup>ab</sup> Zeyang Zhou,<sup>ab</sup> Hong Wang,<sup>ab</sup> Chenghu Dai,<sup>a</sup>  
Yong Sheng Zhao,<sup>a</sup> Yanke Che,<sup>a</sup> Chuang Zhang,<sup>\*a</sup> and Jiannian Yao<sup>a</sup>

<sup>a</sup>*Key Laboratory of Photochemistry, Beijing National Laboratory for Molecular Sciences,  
Institute of Chemistry, Chinese Academy of Sciences, Beijing 100190, China.*

<sup>b</sup>*University of Chinese Academy of Sciences, Beijing 100049, China.*

E-mail: zhangc@iccas.ac.cn

## 1 Experimental Details

2 **Photophysical Characterization.** The molecule 3F6 and 3F6-2BT were synthesized  
3 according to our previous reports [Anal. Chem., 2019, 91, 6408-6412; Adv. Sci., 2021,  
4 8, 2002615.]. UV-vis absorption spectra were measured using a UV-vis  
5 spectrophotometer (Hitachi High-Tech Corporation, UH4150) at normal incidence, and  
6 the fluorescence spectra were measured using HITACHI® F-7000 Fluorescence  
7 Spectrometer. The RT (room temperature) transient photoluminescence decay  
8 characteristics were measured using a compact fluorescence lifetime spectrometer  
9 (Quantaaurus-Tau C11367-35) at an excitation wavelength of 375nm and absolute PL  
10 quantum yield were determined using Hamamatsu Absolute PL Quantum Yield  
11 spectrometer C11347 coupled with an integrating sphere. Temperature-dependent PL  
12 spectra and transient PL decay were measured using the homemade measurement  
13 system consisting of a cryostat (Montana Instruments Cryostation s50), a spectrometer  
14 (Princeton Instruments HRS300), a charge-coupled device (CCD, Pixis 256), a time-to-  
15 digital converter (TDC, qtools quTAG) and photon counters (EXCELITAS SPCM-AQRH-  
16 14) with a time-correlated single photon counting (TCSPC) method, the excitation  
17 emission is 375 nm using a picosecond laser (YANGTZE SOTON LASER SC-Pro).

18 **Lasing Characterization.** The lasing actions of dye-PVK microspheres were measured  
19 with a homebuilt micro-PL system. A 375-nm pulse laser beam was employed as the  
20 excitation source to pump the micropillar resonators, which was generated from the  
21 optical parametric amplifier (Solstice, Spectra-Physics, 800 nm, 100 fs, 1000 Hz). The  
22 pump fluence was controlled with a neutral density filter and the pump beam was  
23 focused to a spot on the sample with an objective lens (Nikon, 20 ×, N.A. = 0.5). The  
24 emission was collected with the same microscope objective, then passed through a  
25 dichroic mirror and a 400 nm long-pass filter to eliminate the excitation beam. After  
26 being focused by a group of lenses onto a confocal iris, the collected PL signal was  
27 finally dispersed with a grating and recorded with a thermal-electrically cooled CCD  
28 (Princeton Instrument, ProEm 1600B).

**OLED Fabrication and Characterization.** The ITO substrates were cleaned carefully using toluene, acetone, tert-butanol for 20 min, respectively, by using an ultrasonic bath, and then dried under the temperature of 110 °C before treated by oxygen plasma. The blend solution of 3F6-and 3F6-2BT-PVK were prepared by dissolving laser dye molecules and PVK in chlorlbenzene (10 mg/mL) with different dopant concentration, respectively. In fabrication of OLEDs, a spin-cast layer of poly(3,4-ethylenedioxythiophene) polystyrene sulphonate (PEDOT:PSS) was used for hole transport; a layer spin-cast from 3F6-PVK and 3F6-2BT-PVK were used as the active layer, respectively; a deposit layer of 1,3,5-Tris(1-phenyl-1H-benzimidazol-2-yl)-benzene (TPBi) was used for electron transport; a thermally evaporated layer of LiF/Al cathode was capped on top. The hole-transport and active layers were fabricated by spin coating at 3000 RPM and annealed at 120°C for 30 min.<sup>1</sup> The device structure is ITO/PEDOT: PSS (25 nm) /3F6-2BT(or 3F6)-PVK (1, 5, 10, 15, 20 wt%) (35 nm)/TPBi (40 nm)/LiF (1.5 nm)/Al (100nm) ,and the light-emitting area of OLEDs was 1 mm by 2 mm. The typical external quantum efficiency (EQE) of 3F6 doped OLEDs is ~0.5 %, and that of 3F6-2BT doped OLEDs is ~3.0 %.

**Magnetic Field Effect Measurements.** Magneto-PL (MPL) measurements were performed using the homemade measurement system consisting of a computer-controlled electromagnet (Beijing Chaoruirenda Technology CR1), the excitation emission is 375 nm using a continuous wave laser (MDL-III-375), the PL signal of the samples were extracted using a calibrated silicon photodiode, and transformed into electrical signal using a photomultiplier (Thorlab PDA200C) and finally collected using a digital multimeter (Keithley DMM6500). For MEL measurement, the OLEDs were transferred to a vacuum chamber of cryostat (Oxford OptistatDry BLV) that was placed in a magnetic field B provided by an electromagnet (EastChanging EM4) with magnetic field up to 150mT. Electrical wires made of metallic alloys were used to keep the parasitic magneto-resistance below 0.001%. The OLEDs were operated at forward bias above turn-on voltages powered by a Keithley 2450 SourceMeter, and the EL emission was monitored with a silicon detector (Thorlabs PDA200C). The MEL is measured at a

1 constant applied bias and defined as:  $MEL(B)=[EL(B)-EL(0)]/EL(0)\times 100\%$ . The external  
2 magnetic field was swept at a rate of 10 mT s<sup>-1</sup> in one direction and back for several  
3 cycles to improve the S/N ratio of MEL(B). The sensitivity of our MEL measurement  
4 was typically 0.05%, and the statistics on multiple OLEDs was given as error bars in the  
5 main text.

6

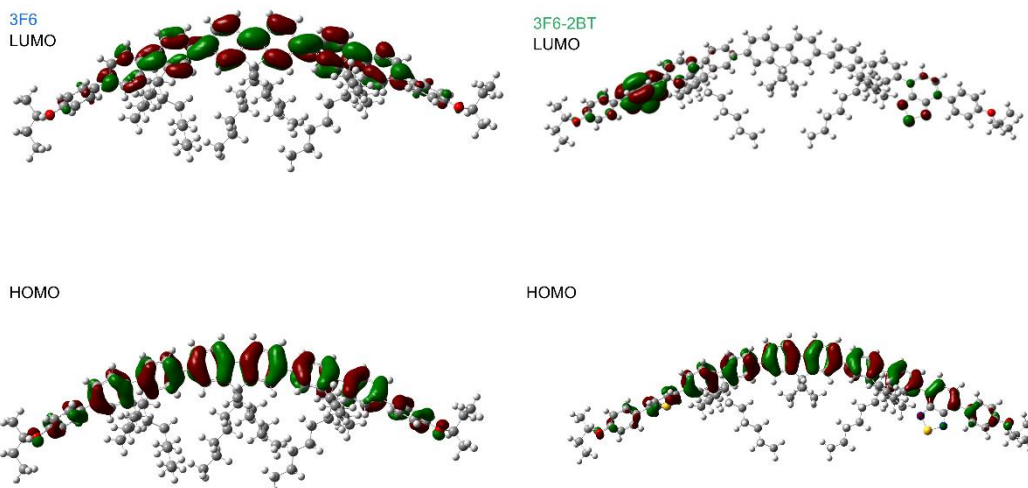

**Fig. S1** DFT-calculated frontier molecular orbitals of 3F6 and 3F6-2BT molecules.

The hybridization of LE/CT states (HLCT characteristics) is related to the twisted angle between D and A moieties in the molecular structure. The co-planar alignment of D-A moieties is beneficial to the overlapping of wavefunctions and the formation of CT state. In comparison, the twisted structure of 3F6-2BT molecules allows for the separation of the molecular orbitals, and consequently leads to the partially overlapped wavefunctions, i.e., a hybridization of LE (D moieties) and CT (D-A moieties) states. DFT calculations reveal the partially separated LUMO and HOMO in 3F6-2BT. The twisted molecular structure of 3F6-2BT allows for the formation of an intercrossed LE and CT state that can provide a pathway for high emission efficiency and maintain long exciton lifetime.

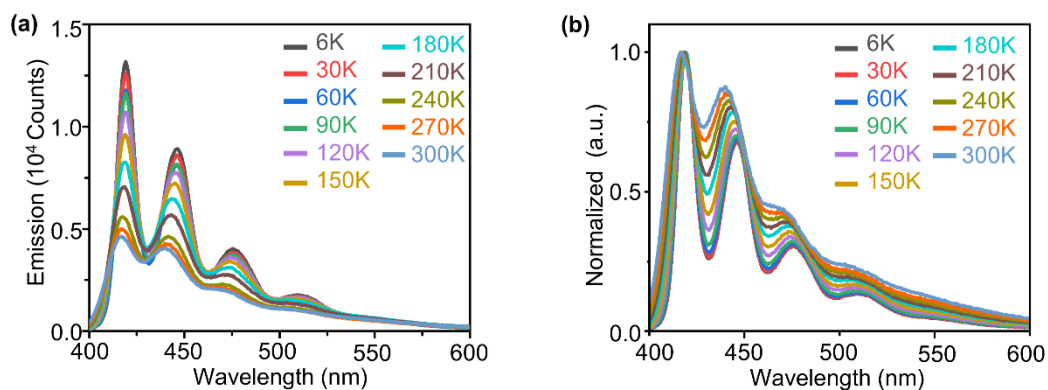

**Fig. S2** (a) Temperature-dependent PL spectra of 3F6 film, and (b) corresponding normalized PL spectra.

With the temperature decreases to 6 K, the PL intensity of 3F6 gradually increases, and the vibronic sub-bands also become more obvious, indicating the locally excited state (LE) characteristics of 3F6.

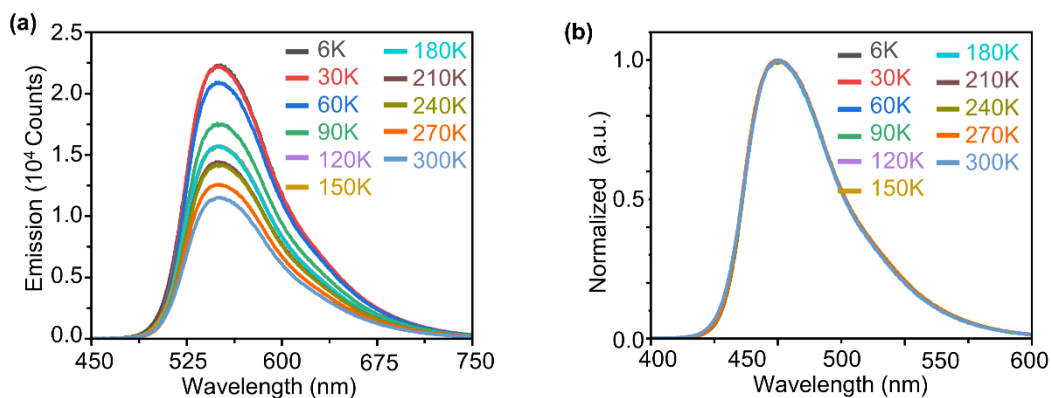

**Fig. S3** (a) Temperature-dependent PL spectra of 3F6-2BT film, and (b) corresponding normalized PL spectra.

Among the temperature from 6 K to 300 K, the shape of PL spectra of 3F6-2BT shows negligible changes, and PL intensity shows a different temperature-dependence below and above 150 K, indicating the HLCT state is the emissive species in the full temperature range, but the LE and CT component dominants at above 150 K and below 150 K, respectively.

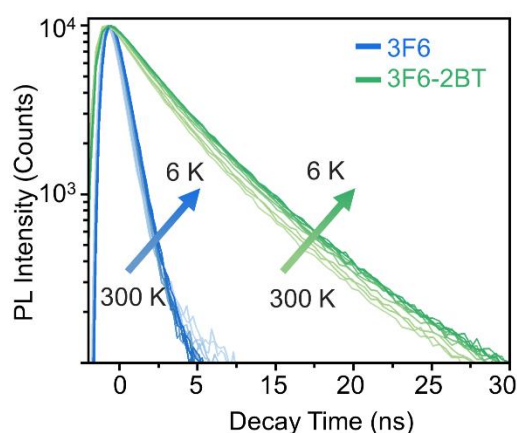

**Fig. S4** Temperature-dependent transient PL decays of 3F6 and 3F6-2BT, respectively.

Both transient PL decay of 3F6 and 3F6-2BT increase with the temperature decreases, but compared to the little change of 3F6 ( $<0.20$  ns in the range from 6 K to 300 K), 3F6-2BT shows an obvious change ( $\sim 0.58$  ns) from 300 K to 150 K and then the decay of 3F6-2BT becomes slower ( $\sim 0.13$  ns), which is consistent with the temperature-dependent PL intensity.

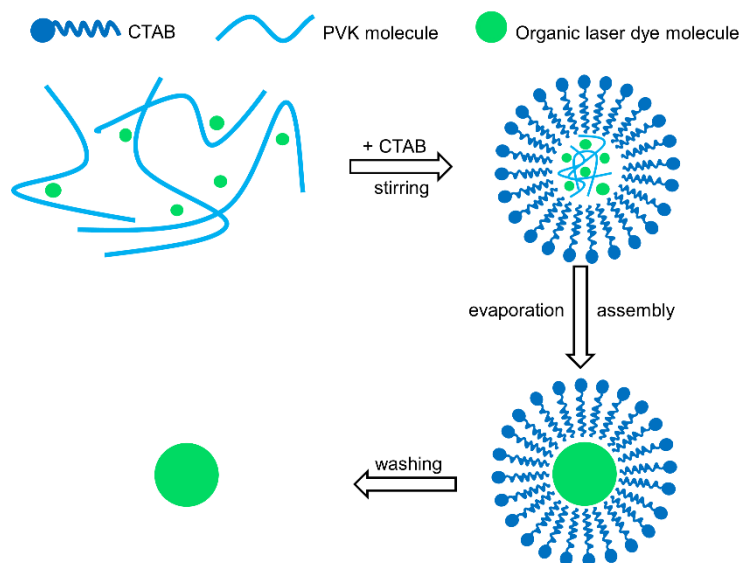

**Fig. S5** Fabrication process of organic laser dye molecule-PVK microspheres

The dye-doped microspheres were prepared through an emulsion-solvent-evaporation method. In a typical preparation, a mixture of PVK (10 mg/mL) and organic laser dye molecule. The (concentration was  $\sim 20$  wt % relative to the PVK) in dichloromethane solution (100  $\mu$ L) was added into an aqueous solution (1 mL) of CTAB (2 mM), which was subsequently treated with vigorous stirring for 30 minutes. The dichloromethane was totally evaporated after aging for 2 hours, and the colloid dispersion of organic laser dye molecule-PVK microspheres were thus obtained. The precipitate was filtered and washed for several times to remove CTAB. The microspheres were re-dispersed in the aqueous solution and drop-casted on substrates for further characterizations.



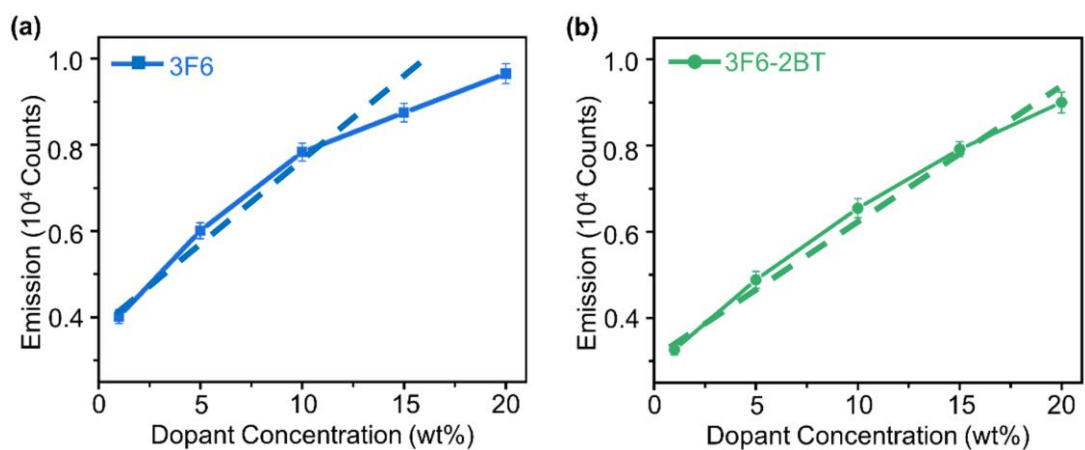

**Fig. S6** PL intensity as a function of doping concentration for (a) 3F6-PVK and (b) 3F6-2BT-PVK blends.

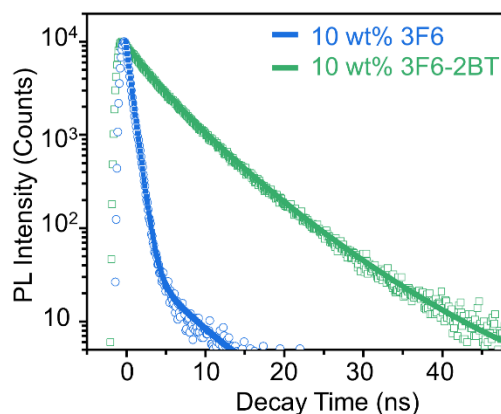

**Fig. S7** Transient PL decay curves measured from 3F6-PVK and 3F6-2BT-PVK blends.

The photoluminescence lifetime measured from the 3F6-2BT-PVK blend (5.17 ns) is sufficiently longer than that for the 3F6-PVK blend (0.82 ns).

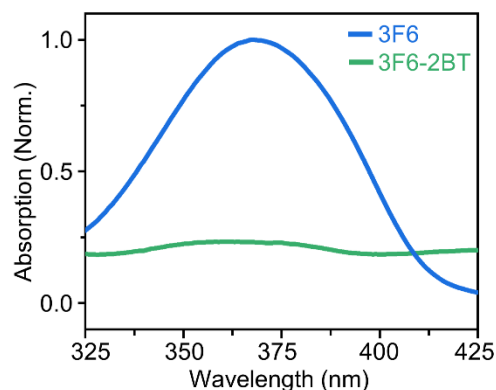

**Fig. S8** Absorption spectra of 3F6- and 3F6-2BT-PVK microspheres.

In order to evaluate the lasing performance of 3F6-2BT, the absorption spectra of both microspheres were measured. The absorption of 3F6 at 375 nm is  $\sim 5$  times than that of 3F6-2BT, so we normalized the pump fluence with respect to the absorption coefficient to evaluate the exciton utilization of 3F6-2BT.

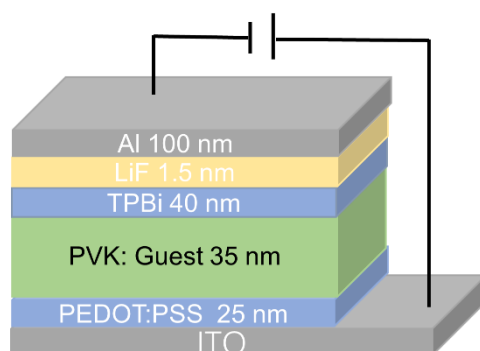

**Fig. S9** Devices structure of organic laser dye molecule doped OLEDs.

The device architecture is ITO (WF 5.1 eV)/PEDOT:PSS (WF 5.3 eV)/PVK (HOMO 5.8 eV, LUMO 2.3 eV) doped with 3F6 (HOMO 5.0 eV, LUMO 1.4 eV) or 3F6-2BT (HOMO 5.1 eV, LUMO 2.3 eV)/TPBi (LUMO 6.2 eV, HOMO 2.7 eV)/LiF, Al (WF 3.2 eV). WF, HOMO, LUMO indicates work function, highest occupied molecular orbital, lowest unoccupied molecular orbital.

1

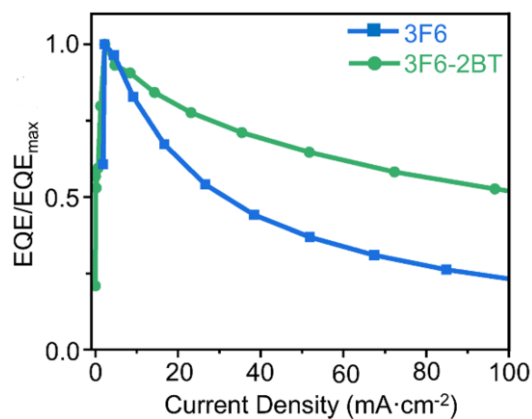

2

3 **Fig. S10** EQE/EQE<sub>max</sub> as a function of current density in the 3F6 and 3F6-2BT OLEDs.

4 The roll-off in EQE is less obvious in the 3F6-2BT OLED compared with the 3F6 device.

5

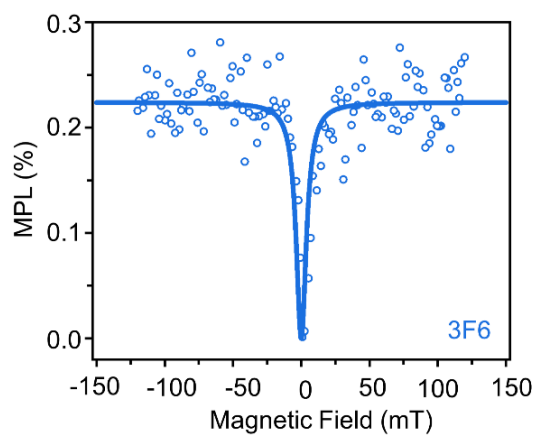6 **Fig. S11** MPL of 3F6 blend obtained at 300  $\mu\text{J cm}^{-2}$ . Excitation wavelength is 375 nm.7 The MPL of 3F6 blend shows only narrow component with a width of  $\sim 4.85$  mT,

8 indicating the spin-mixing process in LE state governed by the hyperfine interaction.

9

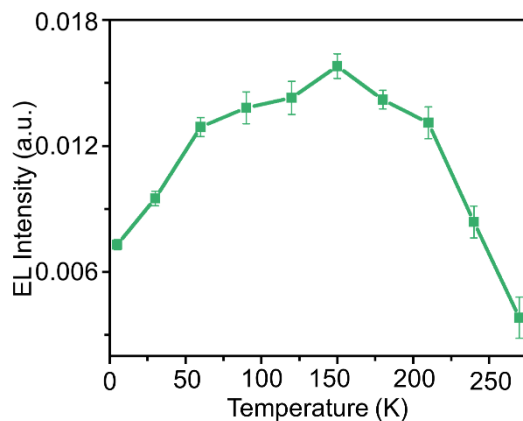

**Fig. S12** Temperature-dependent EL intensity measured from the 3F6-2BT OLED (20 wt%) at 100 mA cm<sup>-2</sup>.

The EL intensity of 3F6-2BT OLEDs at 100 mA cm<sup>-2</sup> shows a maximum at ~150K, which is consistent with the photophysical properties of 3F6-2BT (Fig. 1e and 1f).

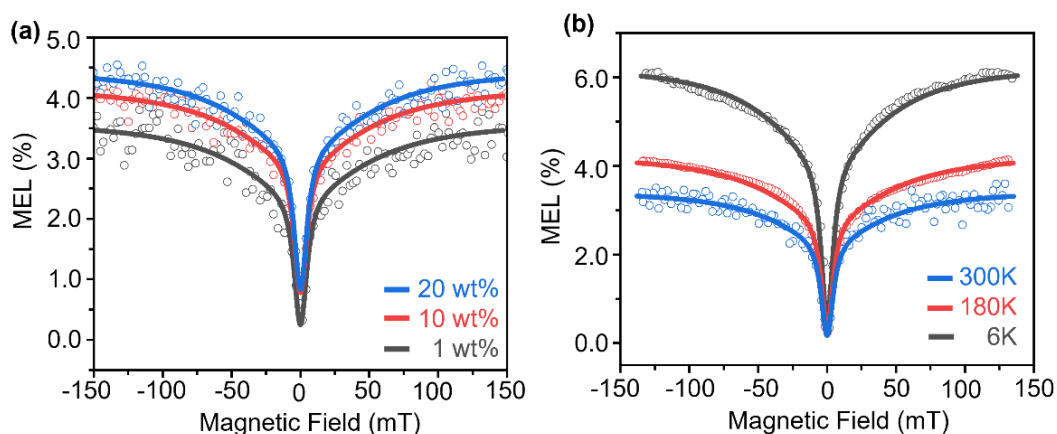

**Fig. S13** (a) MEL(B) curves measured from 3F6 OLEDs with various doping concentrations at room temperature. Current density is 500 mA cm<sup>-2</sup>. (b) MEL(B) curves measured from the 3F6 OLED (20 wt%) at various temperatures. Current density is 100 mA cm<sup>-2</sup>. No broad MEL component (MEL<sub>CT</sub>) could be observed at either high doping concentration or low temperature.
